# Supplementary figures and images for: Electronic spectroscopy of the Ẽ← X transition of NO–Kr and shielding/penetration effects in Rydberg states of NO–Rg complexes
Source: Royal Society of Chemistry journal article supplement (doi:10.1039/b709561a), 2007-10-26

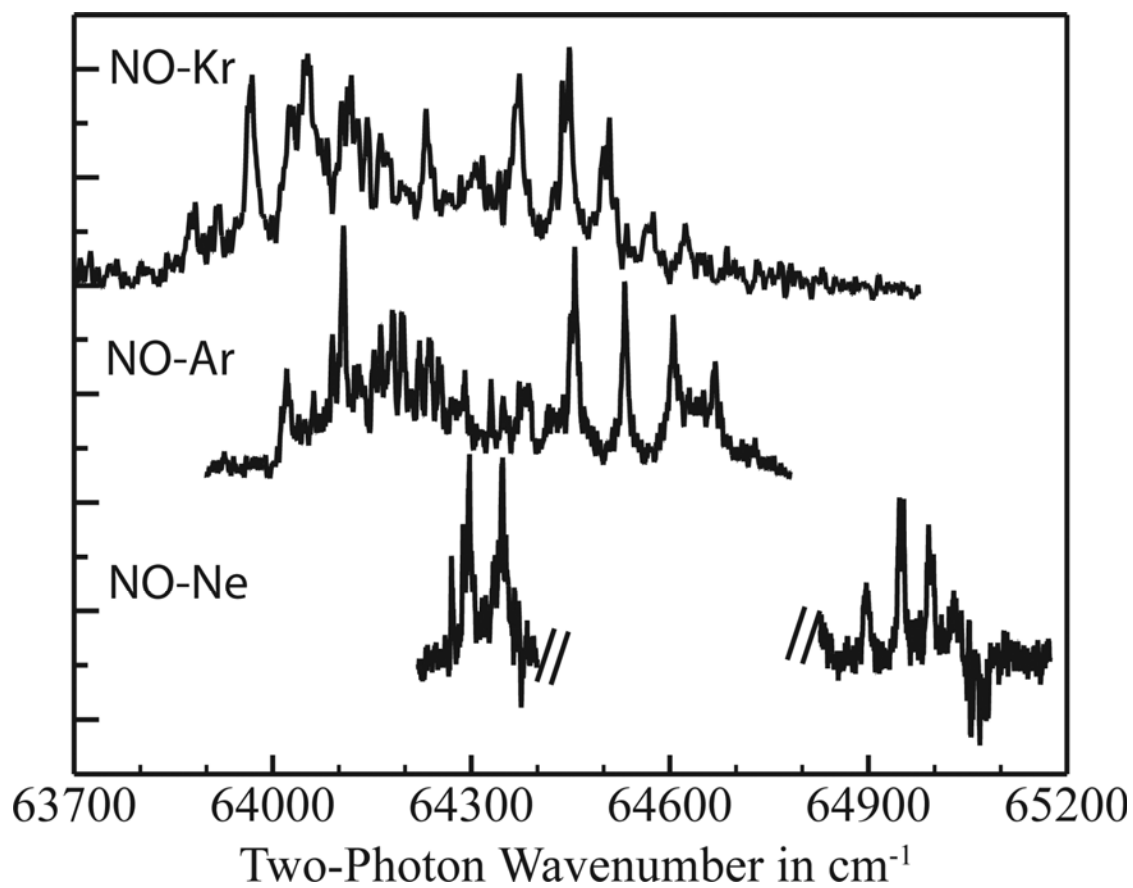

**Fig. S1:** Spectra of the  $\tilde{H}'$ ,  $\tilde{F} \leftarrow \tilde{X}$  transitions in the NO-Rg complexes.

Supplement: b709561a.pdf [file b709561a.pdf]
